# Supplementary material for: Ultrathin, bioresponsive and drug-functionalized protein capsules
Source: Royal Society of Chemistry journal article supplement (doi:10.1039/c2jm33737a), 2012-01-01
Supplement: c2jm33737a.pdf [file c2jm33737a.pdf]

## **SUPPORTING INFORMATION**

### **Ultrathin, Bioresponsive and Drug-Functionalized Protein Capsules**

**Damien Mertz,<sup>a</sup> Hui Xi Wu,<sup>a</sup> Jy Wong,<sup>a</sup> Jiwei Cui,<sup>a</sup> Pramudana Tan,<sup>a</sup> Roxane Alles<sup>b</sup> and Frank Caruso<sup>\*a</sup>**

<sup>a</sup> Department of Chemical and Biomolecular Engineering, The University of Melbourne, Parkville, Victoria 3010, Australia. E-mail [fcaruso@unimelb.edu.au](mailto:fcaruso@unimelb.edu.au)

<sup>b</sup> Institut National de la Santé et de la Recherche Médicale, INSERM Unité U748, 67000 Strasbourg, France.

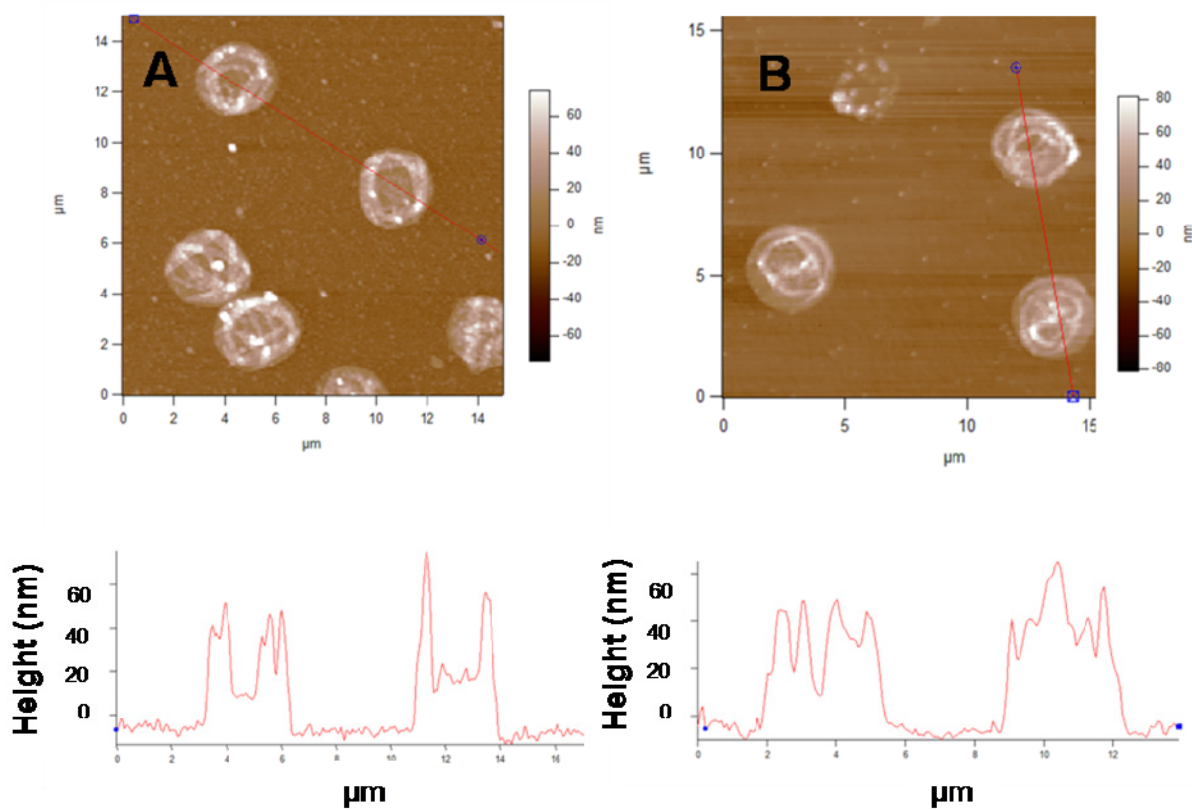

**Fig. S1** Estimation of capsule wall thickness by AFM analysis. AFM images and associated z-profile of BrIBAM-AP capsules initially templated on SiO<sub>2</sub> particles (5 μm diameter) (A) without and (B) with DSP cross-linking. The capsule wall thickness was determined from z-profile analysis of 10 different capsules. The double wall thickness is estimated by taking the minimum of the z-profile of each capsule.

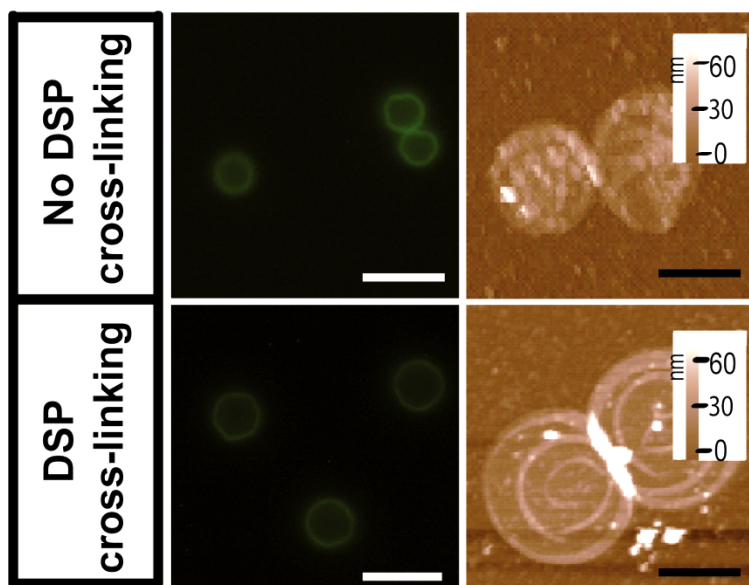

**Fig. S2** Fluorescence microscopy and AFM images of BrIBAM-PLL capsules without and with DSP cross-linking. Scale bars are 5  $\mu\text{m}$  for fluorescence microscopy and 2  $\mu\text{m}$  for AFM images, respectively.

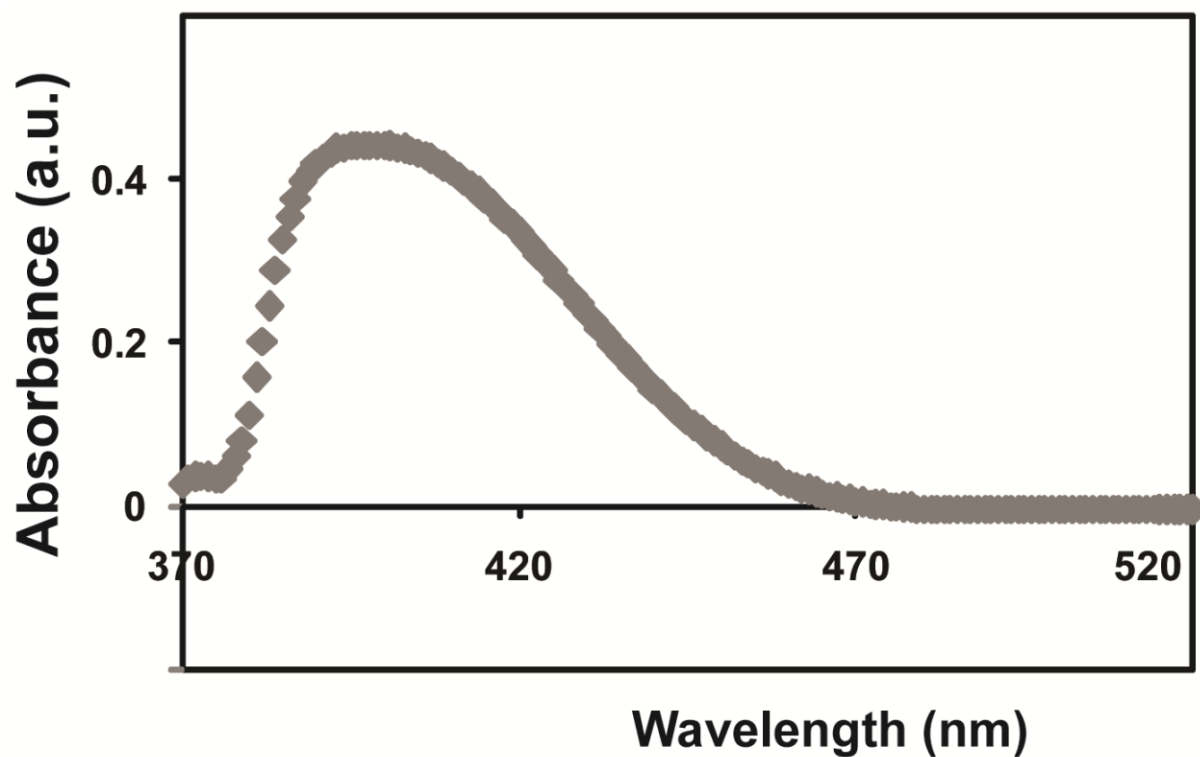

**Fig. S3** Absorbance spectrum of PNP formation catalyzed by the DSP-BrIBAM-AP capsules and followed by UV/vis spectrophotometry after 96 h reaction. Baseline is for a solution of p-nitrophenylphosphate substrate.

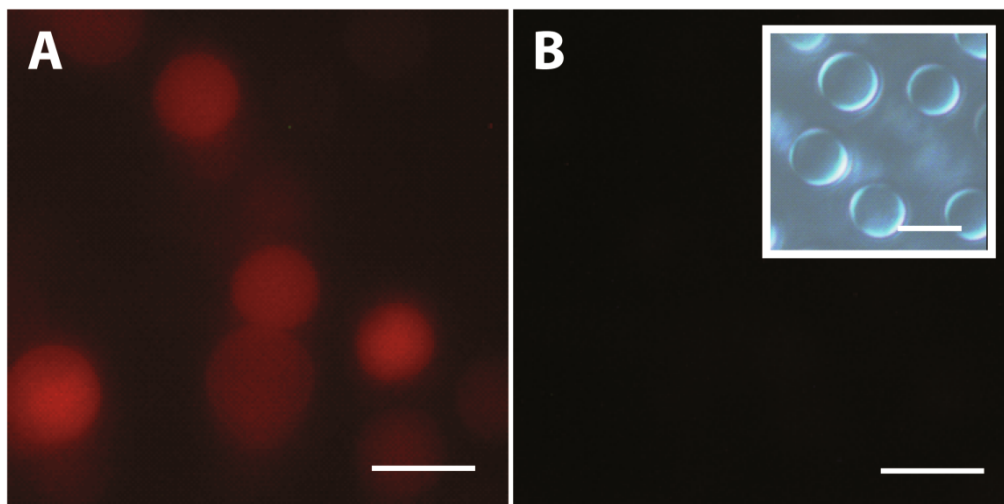

**Fig. S4** Fluorescence microscopy images of DOX-incubated BrIBAM-HSA coated MS spheres (A) after DSP cross-linking and (B) without DSP cross-linking. Inset is a bright field microscopy image of BrIBAM-HSA coated MS spheres incubated with DOX. Scale bars are 5  $\mu\text{m}$  for all images.

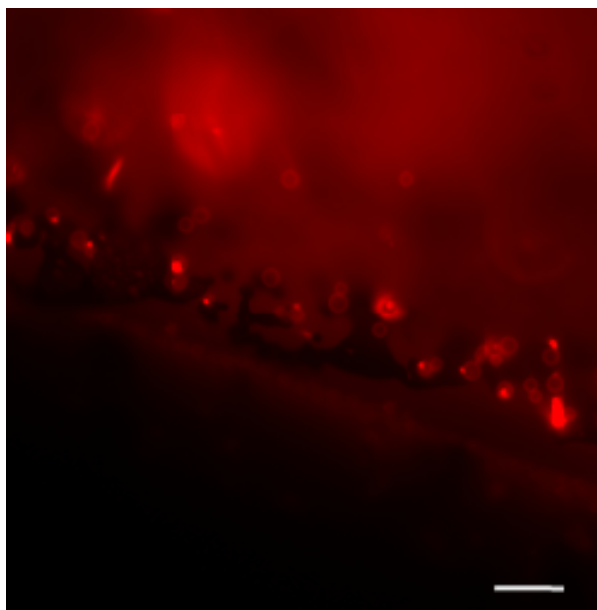

**Fig. S5** Fluorescence microscopy image of DOX-functionalized BrIBAM-HSA capsules incubated with a GSH solution 5 mM during 6 h. The image shows the interface of the droplet containing the capsules. Scale bar is 10  $\mu\text{m}$ .

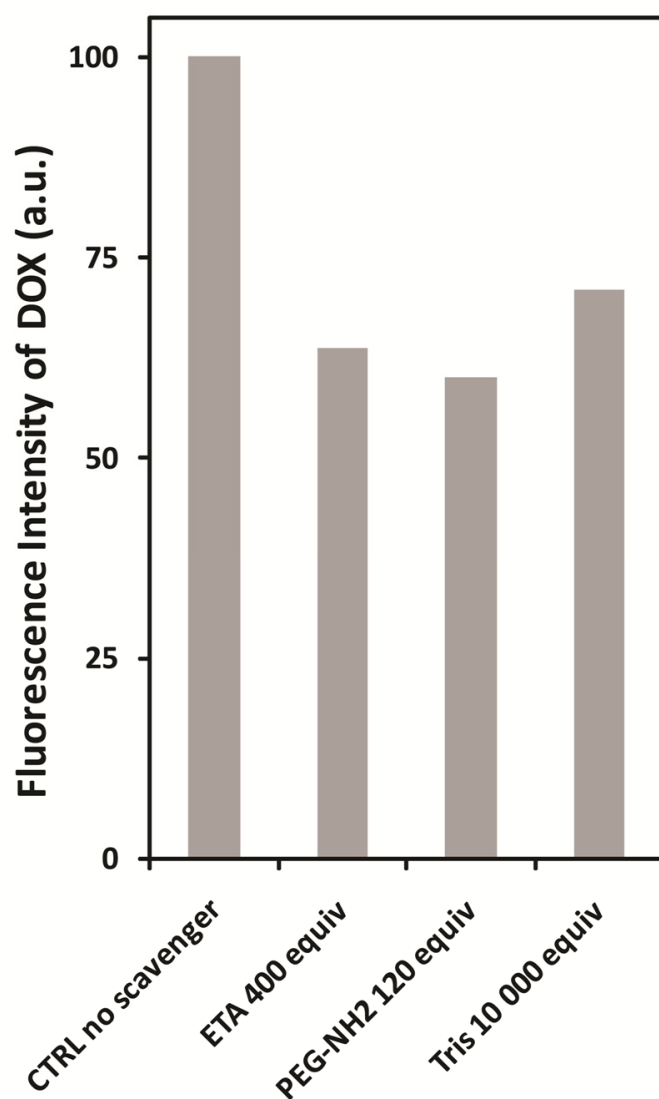

**Fig. S6** Fluorescence intensities measured by flow cytometry of DSP cross-linked BrIBAM-HSA-coated silica particles incubated with DOX, after a pre-incubation period (1 h) in PBS buffer (control, no scavenger), with ETA (400 eq. in PBS buffer), with PEG-NH<sub>2</sub> (120 eq. in PBS buffer), with Tris (10 000 eq. in PBS buffer).

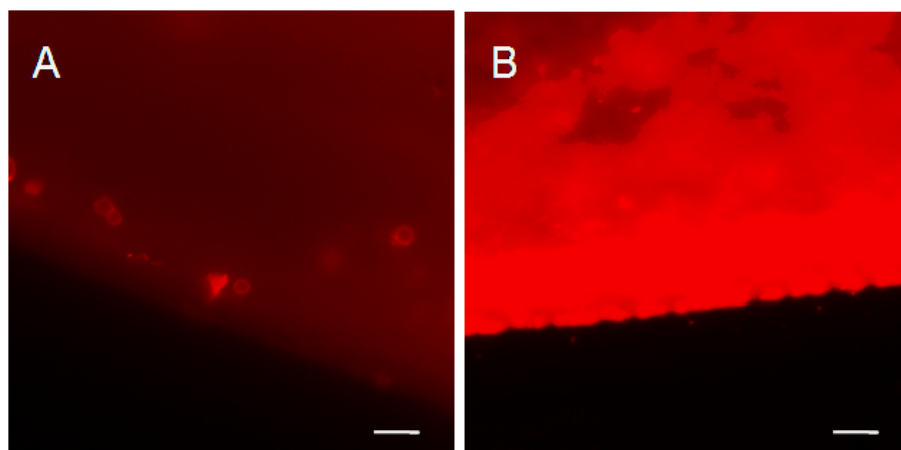

**Fig. S7** Fluorescence microscopy images (taken with the same acquisition parameters – excitation and detector gain) of DOX-functionalized BrIBAM-HSA capsules incubated with a protease solution at  $0.5 \text{ mg.mL}^{-1}$  at  $37 \text{ }^{\circ}\text{C}$  incubated (A) 3 h and (B) 34 h. The image shows the interface of the droplet containing the capsules. Scale bars are  $10 \text{ }\mu\text{m}$ .



**Table S1** Molecular weight (MW) and isoelectric point (IEP) of proteins and adsorption conditions. All the data were obtained from suppliers (Sigma-Aldrich).

| <b>Protein</b> | <b>MW<br/>(kDa)</b> | <b>IEP</b>          | <b>Adsorption Conditions</b>      |
|----------------|---------------------|---------------------|-----------------------------------|
| AP             | 57.1                | 5.7                 | Milli Q water (pH 5.8)            |
| INS            | 5.8                 | 5.3                 | Milli Q water (pH 5.8)            |
| LYS            | 14.3                | 11.3                | NaHCO <sub>3</sub> buffer (pH 10) |
| HSA            | 68                  | 4.7                 | Milli Q water (pH 5.8)            |
| HRP            | 44                  | 3-9<br>(7 isosymes) | Milli Q water (pH 5.8)            |

**Table S2** Diameters ( $\mu\text{m}$ ) of the BrIBAM-protein capsules without and with DSP cross-linking, as assessed by microscopy analysis. For each capsule size measurement, the analysis was carried out on a minimum number of 30 capsules.

|                             | <b>AP</b>     | <b>INS</b>    | <b>LYS</b>    | <b>HSA</b>    | <b>HRP</b>    |
|-----------------------------|---------------|---------------|---------------|---------------|---------------|
| <b>No DSP cross-linking</b> | $2.8 \pm 0.2$ | $4.1 \pm 0.4$ | $2.9 \pm 0.1$ | $3.9 \pm 0.2$ | $3.3 \pm 0.2$ |
| <b>DSP cross-linking</b>    | $3.4 \pm 0.2$ | $3.5 \pm 0.3$ | $3.5 \pm 0.1$ | $4.2 \pm 0.4$ | $4.2 \pm 0.2$ |

**Table S3** Estimated wall thicknesses (nm) of the BrIBAM-protein capsules without and with DSP cross-linking obtained by AFM z-profile analysis. For each capsule size measurement, the analysis was carried out on a minimum number of 10 capsules.

|                             | <b>AP</b>  | <b>INS</b> | <b>LYS</b> | <b>HSA</b> | <b>HRP</b> |
|-----------------------------|------------|------------|------------|------------|------------|
| <b>No DSP cross-linking</b> | 9.3 ± 1.9  | 6.0 ± 0.6  | 5.0 ± 1.0  | 5.7 ± 0.9  | 7.8 ± 2.1  |
| <b>DSP cross-linking</b>    | 12.9 ± 1.4 | 7.7 ± 1.0  | 9.6 ± 1.1  | 6.8 ± 0.9  | 8.4 ± 1.1  |

**Table S4** Diameters and estimated wall thicknesses of the BrIBAM-PLL capsules without and with DSP cross-linking.

|                             | <b>Size (<math>\mu\text{m}</math>)</b> | <b>Wall thickness (nm)</b> |
|-----------------------------|----------------------------------------|----------------------------|
| <b>No DSP cross-linking</b> | $1.7 \pm 0.1$                          | $7.7 \pm 1.1$              |
| <b>DSP cross-linking</b>    | $2.5 \pm 0.1$                          | $15.7 \pm 1.1$             |

**Table S5** Morphology of the structures observed after silica template removal for DSP cross-linked proteins (HSA, HRP and AP) pre-adsorbed onto an amino-modified prelayer (APTS, PLL or PEI).

|            | <b>APTS</b>  | <b>PLL</b> | <b>PEI</b> |
|------------|--------------|------------|------------|
| <b>HSA</b> | Disassembled | Collapsed  | Collapsed  |
| <b>HRP</b> | Disassembled | Collapsed  | Collapsed  |
| <b>AP</b>  | Disassembled | Collapsed  | Collapsed  |

**Table S6A** AFM images and associated z-profiles of DSP cross-linked BrIBAM-INS capsules, respectively, templated on 1.11  $\mu\text{m}$ , 585, 304 and 147 nm size  $\text{SiO}_2$  particles. Average diameter and estimated thickness of the capsules were obtained from analysis of 10 capsules. Z-profiles represent height (nm) vs. distance ( $\mu\text{m}$ ) traced in red lines.

| Template                | 1110 nm            | 585 nm             | 304 nm             | 147 nm             |
|-------------------------|--------------------|--------------------|--------------------|--------------------|
| <b>AFM image</b>        |                    |                    |                    |                    |
| <b>Z-Profile</b>        |                    |                    |                    |                    |
| <b>Average diameter</b> | <b>856 ± 81 nm</b> | <b>542 ± 41 nm</b> | <b>367 ± 59 nm</b> | <b>324 ± 51 nm</b> |

**Table S6B** AFM images and associated z-profiles of DSP cross-linked BrIBAM-HSA capsules, respectively, templated on 1.11  $\mu\text{m}$ , 585, 304 and 147 nm size  $\text{SiO}_2$  particles. Average diameter and estimated thickness of the capsules were obtained from analysis of 10 capsules. Z-profiles represent height (nm) vs. distance ( $\mu\text{m}$ ) traced in red lines.

| Template                | 1110 nm             | 585 nm              | 304 nm             | 147 nm             |
|-------------------------|---------------------|---------------------|--------------------|--------------------|
| <b>AFM image</b>        |                     |                     |                    |                    |
| <b>Z-Profile</b>        |                     |                     |                    |                    |
| <b>Average diameter</b> | <b>1212 ± 79 nm</b> | <b>739 ± 134 nm</b> | <b>393 ± 11 nm</b> | <b>243 ± 50 nm</b> |
